# Supplementary material for: Systematic pan-cancer analysis identifies SLC31A1 as a biomarker in multiple tumor types
Source: Springer Nature journal article supplement (doi:10.1186/s12920-023-01489-9), 2023-03-27

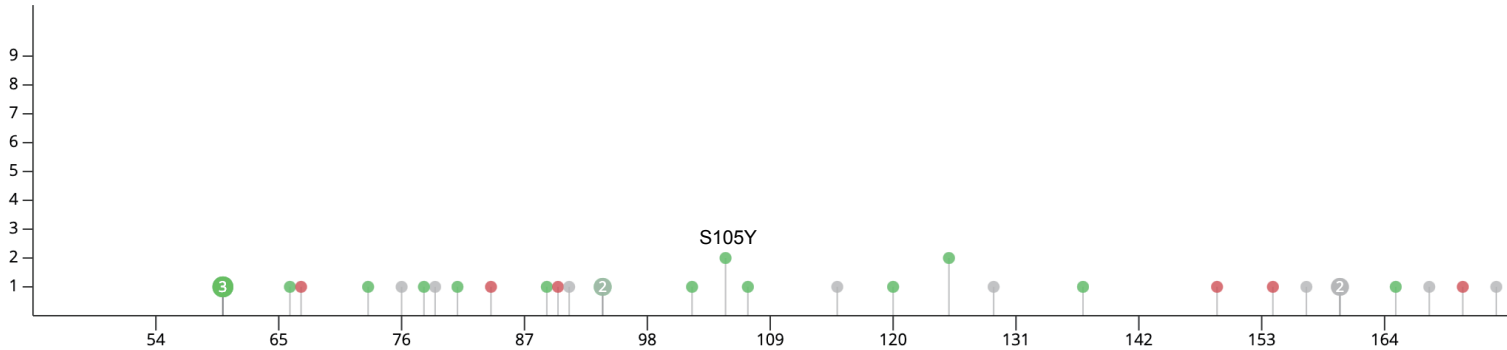

Supplement: MOESM3 [file 12920_2023_1489_MOESM3_ESM.pdf]
